# Supplementary material
Source: publisher figshare collection journal article supplement (https://gsajournals.figshare.com/ndownloader/files/26451005)
Supplement: Supplementary file 1 [file 26451005]

**Table S2. Oligonucleotides used for RT-qPCR in this study**

| Oligo ID | Sequence (5' to 3') |
| --- | --- |
| *Stag1 F* | ACGGGGATCCTGTCACCTTA |
| *Stag1 R* | ATCCAGAAGTGCGATGTCCC |
| *Stag2 F* | TCTTTATTCAGTGCTCAGGCTG |
| *Stag2 R* | CCCCACTATCCTCGTCAAATTC |
| *Smc1a F* | CCGAGAGAGGGAAATGAAAGAC |
| *Smc1a R* | GGATGTTACGCACACCAATTTC |
| *Tbp F* | TGTATCTACCGTGAATCTTGGC |
| *Tbp R* | CCAGAACTGAAAATCAACGCAG |
| *Gpa33 F* | CTAGGTGGGCAGACTGATTTAC |
| *Gpa33 R* | GCCTGAGTCCTGGATAGTAATG |
| *Ildr2 F* | GGGCTGGCGCTACATATAAA |
| *Ildr2 R* | AAATGGATGGAGAGCAGATGAG |
| *Laptm5 F* | GATGGCAAGCTGTCCTTATCT |
| *Laptm5 R* | GTGTGATCACCAGACCCTAAAT |
| *Sdc3 F* | CCTACCCGTTCTCTCCCTATAA |
| *Sdc3 R* | ACCCTCTCCTCCTTCTCTTATT |
| *Tdh F* | GTCCAGAGCAGACTGAAGATAAA |
| *Tdh R* | GATACCCTGCAGACACAGAAG |
| *Xkr6 F* | CACCTTGACCCAGATTGAGAAG |
| *Xkr6 R* | TGGTGGTGGTTCTGTGTATTG |
| *Dmtn F* | GTGGAGACAGAATGGAGGAAAC |
| *Dmtn R* | GTTCCCTGATGGCCTTAATCTC |
| *Bmp1 F* | GACAACTCGGTACAGAGGAAAG |
| *Bmp1 R* | CGAACTGGGCATGGGAATAA |
| *Jam2 F* | GTCAGAGAACACAGAGGGTAAAC |
| *Jam2 R* | CTTGGAAGAGGAGGGAGATTTG |
| *App F* | TGACAAGAAGGCCGTTATCC |
| *App R* | GGCCATGTGTGTCTCTACAA |
| *Pou5f1* (OCT4) *F* | AAAGCAACTCAGAGGGAACCTCCTC |
| *Pou5f1* (OCT4) *R* | GCTTGGCAAACTGTTCTAGCTCCTTC |
| *Sox2 F* | GAGTGGAAACTTTTGTCCGAGA |
| *Sox2 R* | GAAGCGTGTACTTATCCTTCTTCAT |
| *Nanog F* | CCTCAGCCTCCAGCAGATGC |
| *Nanog R* | CCGCTTGCACTTCATCCTTTG |
| *Pax6 F* | AACAACCTGCCTATGCAACC |
| *Pax6 R* | ACTTGGACGGGAACTGACAC |
| *Nestin F* | CTGCAGGCCACTGAAAAGTT |
| *Nestin R* | ATTAGGCAAGGGGGAAGAGA |
| *Foxa2 F* | CACTCGGCTTCCAGTATGC |
| *Foxa2 R* | GTTCATGCCATTCATCCCCAG |
| *T* (Brachyury) *F* | ATGAAGGCGCCTGTGTCTTTC |
| *T* (Brachyury) *R* | GGAAGGCTTTAGCAAATGGGT |
| *Gata6 F* | TTGCTCCGGTAACAGCAGTG |
| *Gata6 R* | GTGGTCGCTTGTGTAGAAGGA |
| *Sox17 F* | CGCACGGAATTCGAACAGTA |
| *Sox17 R* | GTCAAATGTCGGGGTAGTTG |
